# Supplementary material for: Direct conversion of glycerol to n-propanol over a tandem catalytic dehydration–hydrogenation system
Source: Royal Society of Chemistry journal article supplement (doi:10.1039/d2cy00671e), 2022-01-01
Supplement: d2cy00671e1.pdf [file d2cy00671e1.pdf]

# Supporting Information

## Direct conversion of glycerol to *n*-propanol over tandem catalytic dehydration-hydrogenation system

Thanasak Solos,<sup>a,b</sup> Napanot Methiritthikul,<sup>a</sup> Chanakran Homla-or,<sup>a</sup> Preedawan Duangchan,<sup>a</sup>  
Kittisak Choojun,<sup>\*a,b</sup> and Tawan Sooknoi<sup>\*\*a,b</sup>

<sup>a</sup>Department of Chemistry, School of Science, King Mongkut's Institute of Technology  
Ladkrabang, Chalongkrung Road, Ladkrabang, Bangkok, 10520, Thailand

<sup>b</sup>Catalytic Chemistry Research Unit, School of Science, King Mongkut's Institute of  
Technology Ladkrabang, Chalongkrung Road, Ladkrabang, Bangkok, 10520, Thailand

E-mail: thanasak.ccr@gmail.com, baszkroegchai@gmail.com, starlikebyun@gmail.com,  
mymineee@hotmail.com, kittisak.ch@kmitl.ac.th, kstawan@gmail.com

\* Corresponding author for <sup>a</sup>Department of Chemistry

\*\* Corresponding author for <sup>b</sup>Catalytic Chemistry Research Unit

**Table S1** Conversion and products yields over the tandem catalytic system

| Entry | Catalysts |                       | $W/F$ ( $\text{g}\cdot\text{h}\cdot\text{mol}^{-1}$ ) | Reaction Temperature ( $^{\circ}\text{C}$ ) | Glycerol Conversion (%mol) | Acrolein Conversion <sup>a</sup> (%mol) | Yield (%mol) |                |                 |                    |                |              |         | <i>n</i> -Propanol Hydrogenation Selectivity <sup>b</sup> |             |
|-------|-----------|-----------------------|-------------------------------------------------------|---------------------------------------------|----------------------------|-----------------------------------------|--------------|----------------|-----------------|--------------------|----------------|--------------|---------|-----------------------------------------------------------|-------------|
|       | Top bed   | Bottom bed            |                                                       |                                             |                            |                                         | Acrolein     | Hydroxyacetone | Propionaldehyde | <i>n</i> -Propanol | Propanoic acid | Acetaldehyde | Ethanol |                                                           | Acetic Acid |
| 1     | HZSM-5    | 20Ni/SiO <sub>2</sub> | 177   59                                              | 300   150                                   | 100                        | 98.1                                    | 1.5          | 10.2           | 36.7            | 38.1               | 6.0            | -            | 2.4     | 5.1                                                       | 46          |
| 2     | HZSM-5    | 20Ni/SiO <sub>2</sub> | 177   59                                              | 300   200                                   | 100                        | 100                                     | -            | 2.6            | 11.4            | 48.1               | 4.5            | -            | 1.6     | 4.3                                                       | 58          |
| 3     | HZSM-5    | 20Ni/SiO <sub>2</sub> | 177   59                                              | 300   300                                   | 100                        | 100                                     | -            | -              | 7.4             | 13.8               | 3.4            | -            | 1.3     | 3.2                                                       | 17          |

(Reaction conditions: 10wt.% glycerol solution, 100 mL/min of H<sub>2</sub>, 1 atm. The activity is at 1 h on stream.)

<sup>a</sup> Estimated from acrolein produced by the first catalytic bed.

<sup>b</sup> *n*-Propanol selectivity based on hydrogenation of acrolein/propionaldehyde produced from the first bed.

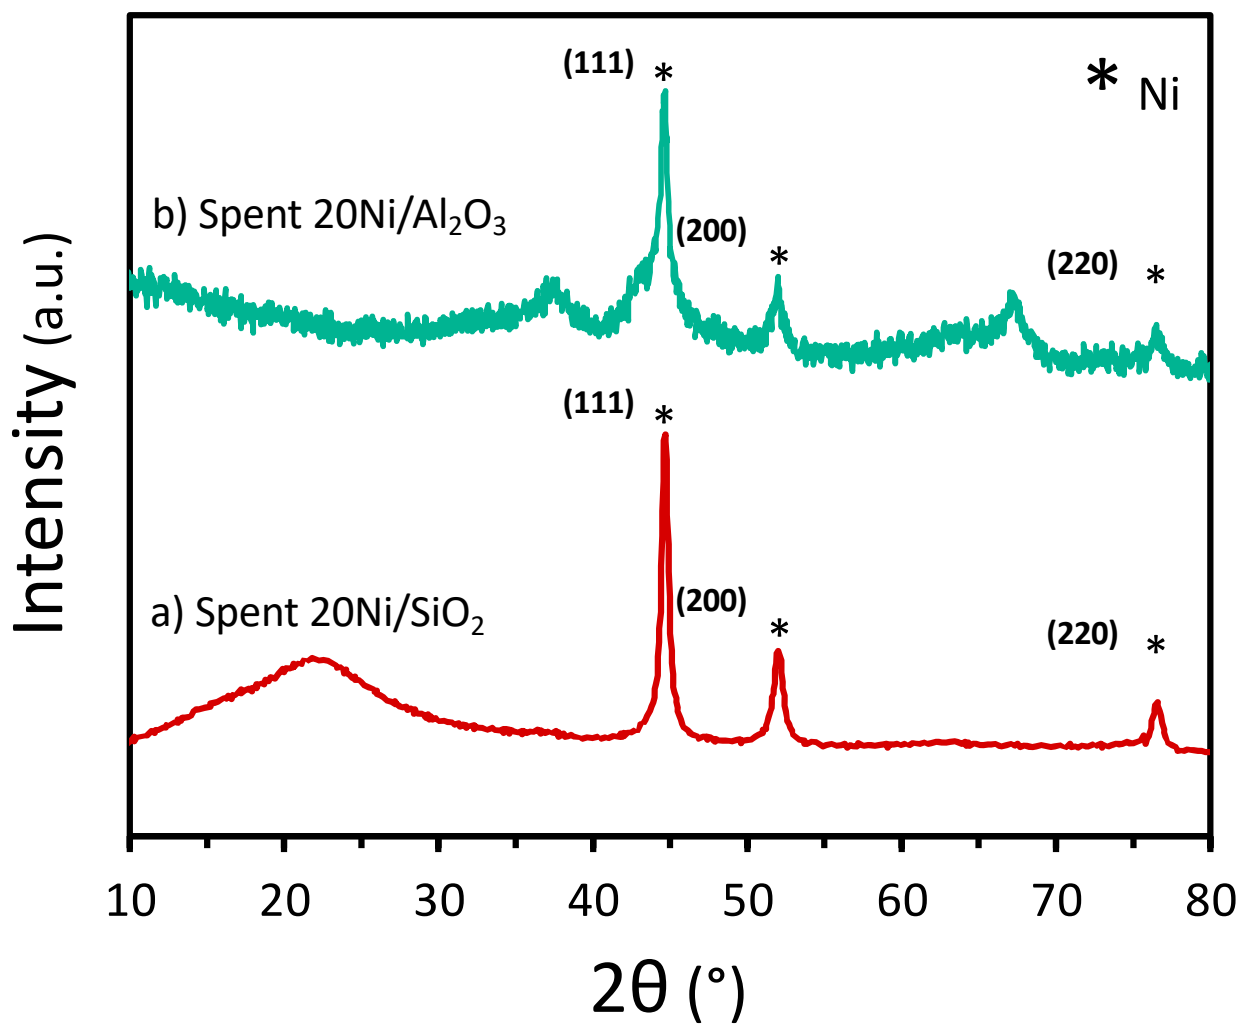

**Fig. S1** XRD patterns of supported Ni catalysts after reaction.

**Table S2** Ni content of fresh and spent catalysts

| Catalysts                           | Ni Content <sup>a</sup> (wt.%) |       |
|-------------------------------------|--------------------------------|-------|
|                                     | Fresh                          | Spent |
| 20Ni/SiO <sub>2</sub>               | 21.1                           | 21.0  |
| 20Ni/Al <sub>2</sub> O <sub>3</sub> | 22.0                           | 21.9  |

<sup>a</sup> Determined by XRF analysis.

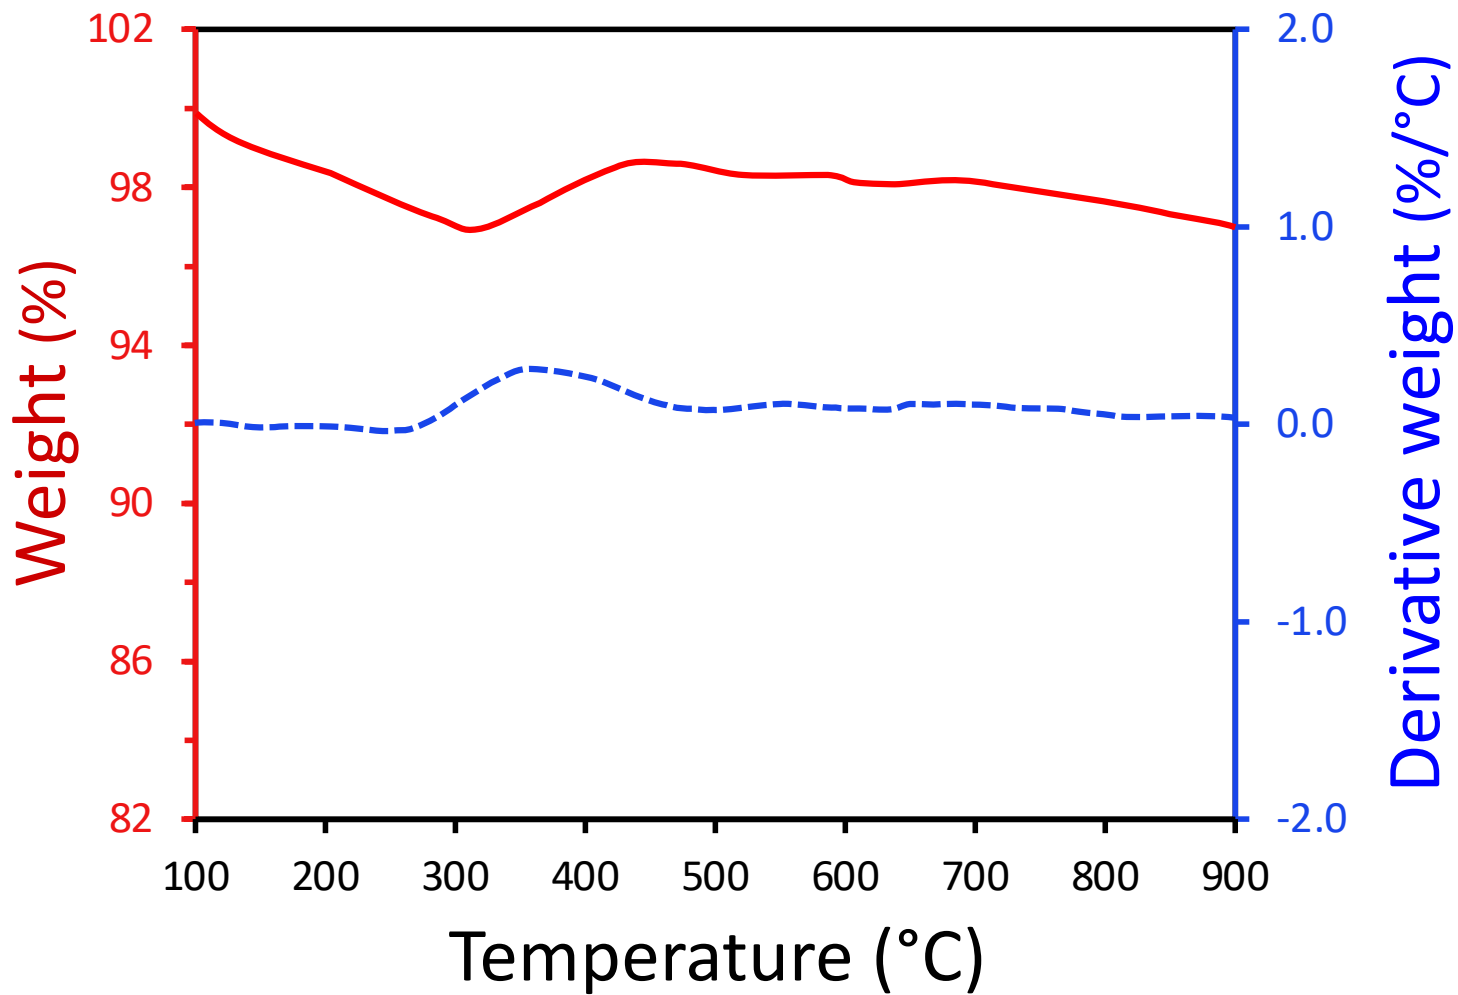

**Fig. S2** TGA and DTG thermogram of spent 20Ni/Al<sub>2</sub>O<sub>3</sub> catalyst.

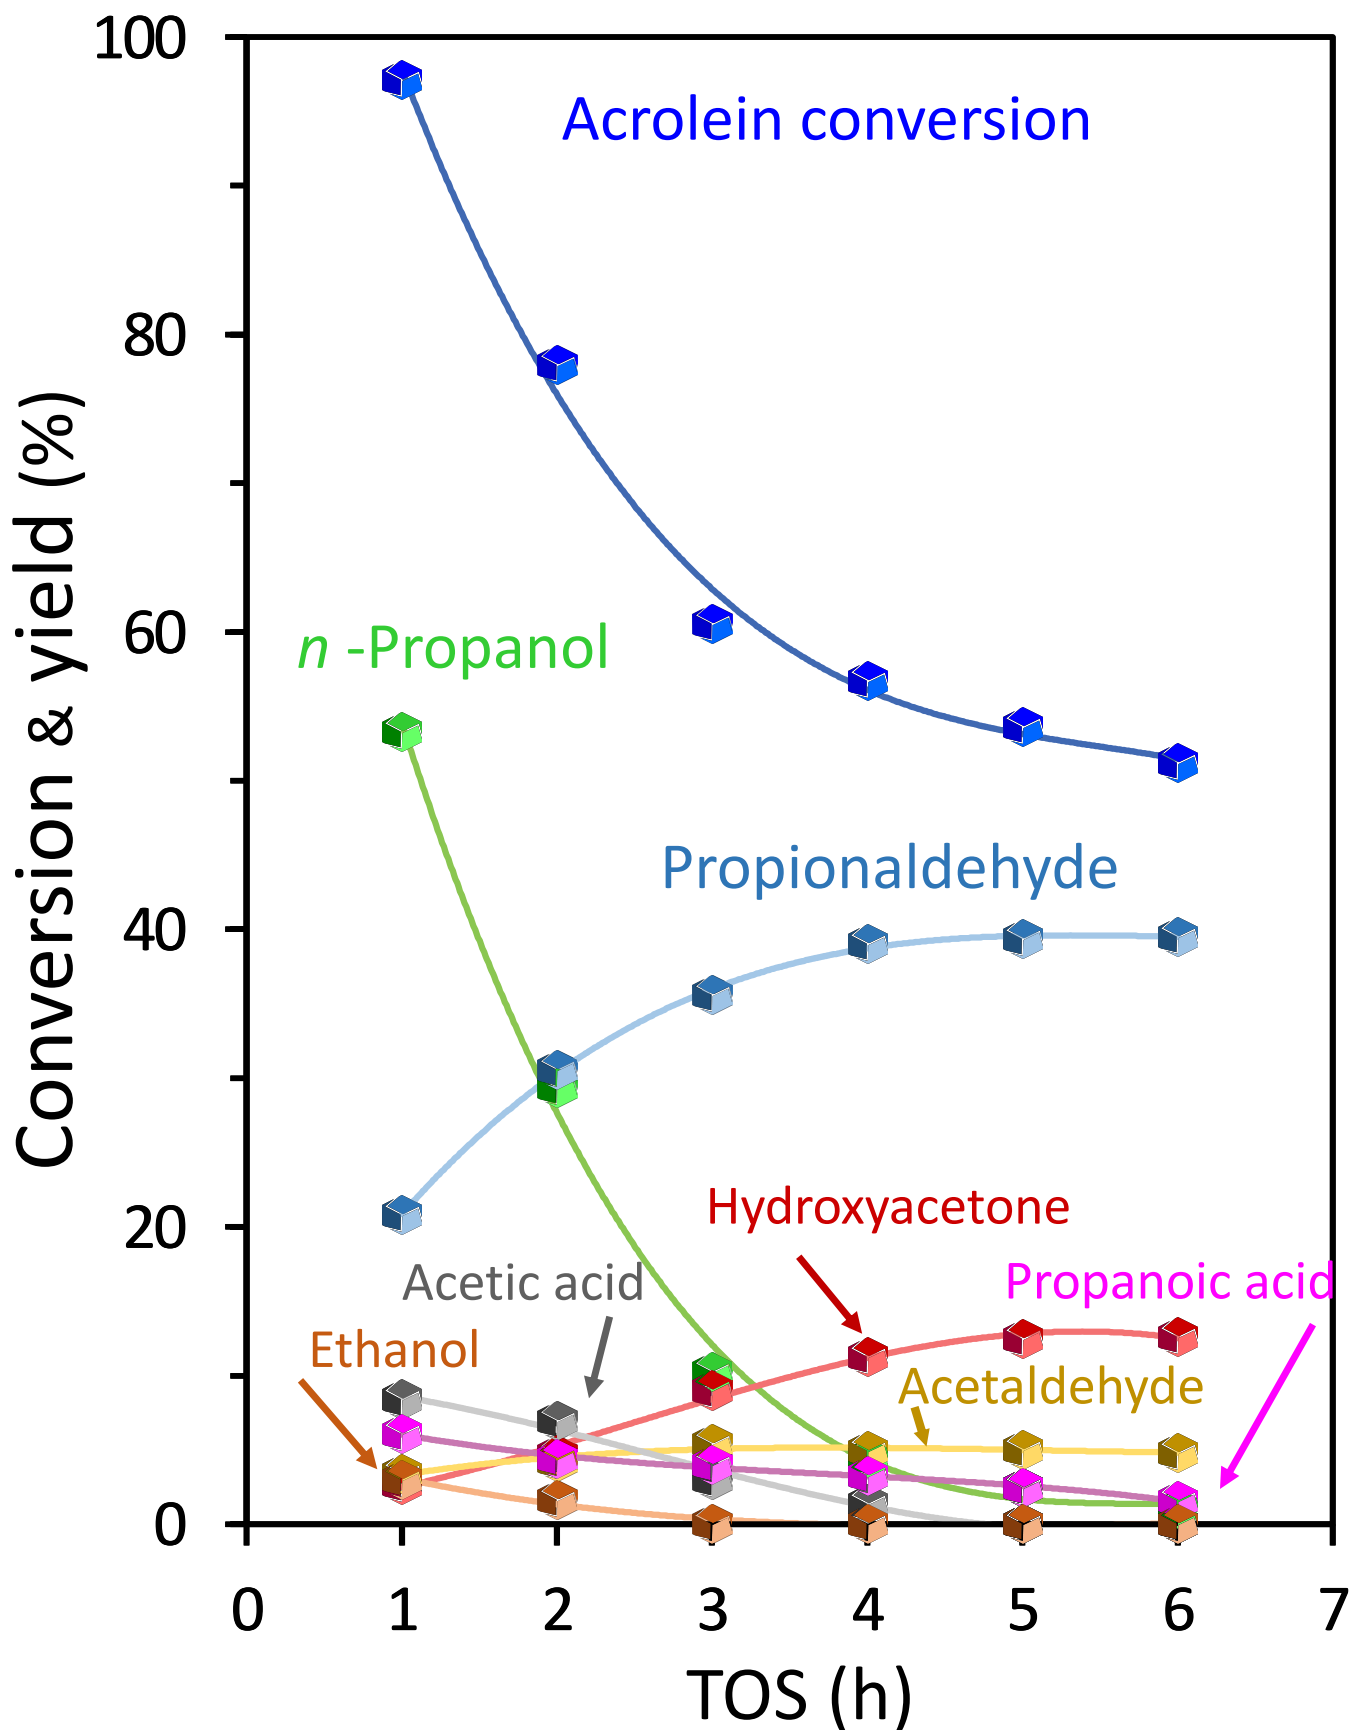

**Fig. S3** The reaction of glycerol over HZSM-5|20Ni/Al<sub>2</sub>O<sub>3</sub>. (Reaction conditions: 10wt.% glycerol,  $W/F$  177|30 g·h·mol<sup>-1</sup>, 100 mL/min of H<sub>2</sub>, 1 atm, 300|175 °C) Note: 100% glycerol conversion over the first catalytic bed.
